# Supplementary material for: Synthesis of carbazole-based hetero-core-modified porphyrins
Source: Royal Society of Chemistry journal article supplement (doi:10.1039/c3ob42564a), 2014-01-01
Supplement: c3ob42564a1.pdf [file c3ob42564a1.pdf]

**Supplementary Information**  
**for**  
**Synthesis of Carbazole-Based Hetero-Core-Modified Porphyrins**

**Chihiro Maeda,<sup>\*a,b</sup> Motoki Masuda,<sup>a</sup> Naoki Yoshioka<sup>\*a</sup>**

<sup>a</sup> *Department of Applied Chemistry, Faculty of Science and Technology, Keio University, Kohoku-ku, Yokohama  
223-8522, Japan;*

<sup>b</sup> *Present address: Division of Chemistry and Biochemistry, Graduate School of Natural Science and Technology,  
Okayama University, Tsushima, Okayama 700-8530, Japan. E-mail: cmaeda@okayama-u.ac.jp*

**Table of Contents**

|                                                              |     |
|--------------------------------------------------------------|-----|
| NMR Spectra.....                                             | S2  |
| Cyclic Voltammogram and Differential Pulse Voltammogram..... | S11 |
| NICS Values.....                                             | S12 |
| X-ray Crystal Structures.....                                | S13 |
| References.....                                              | S16 |

**Fig. S1**  $^1\text{H}$  and  $^{13}\text{C}$  NMR spectra of **7** in  $\text{CDCl}_3$

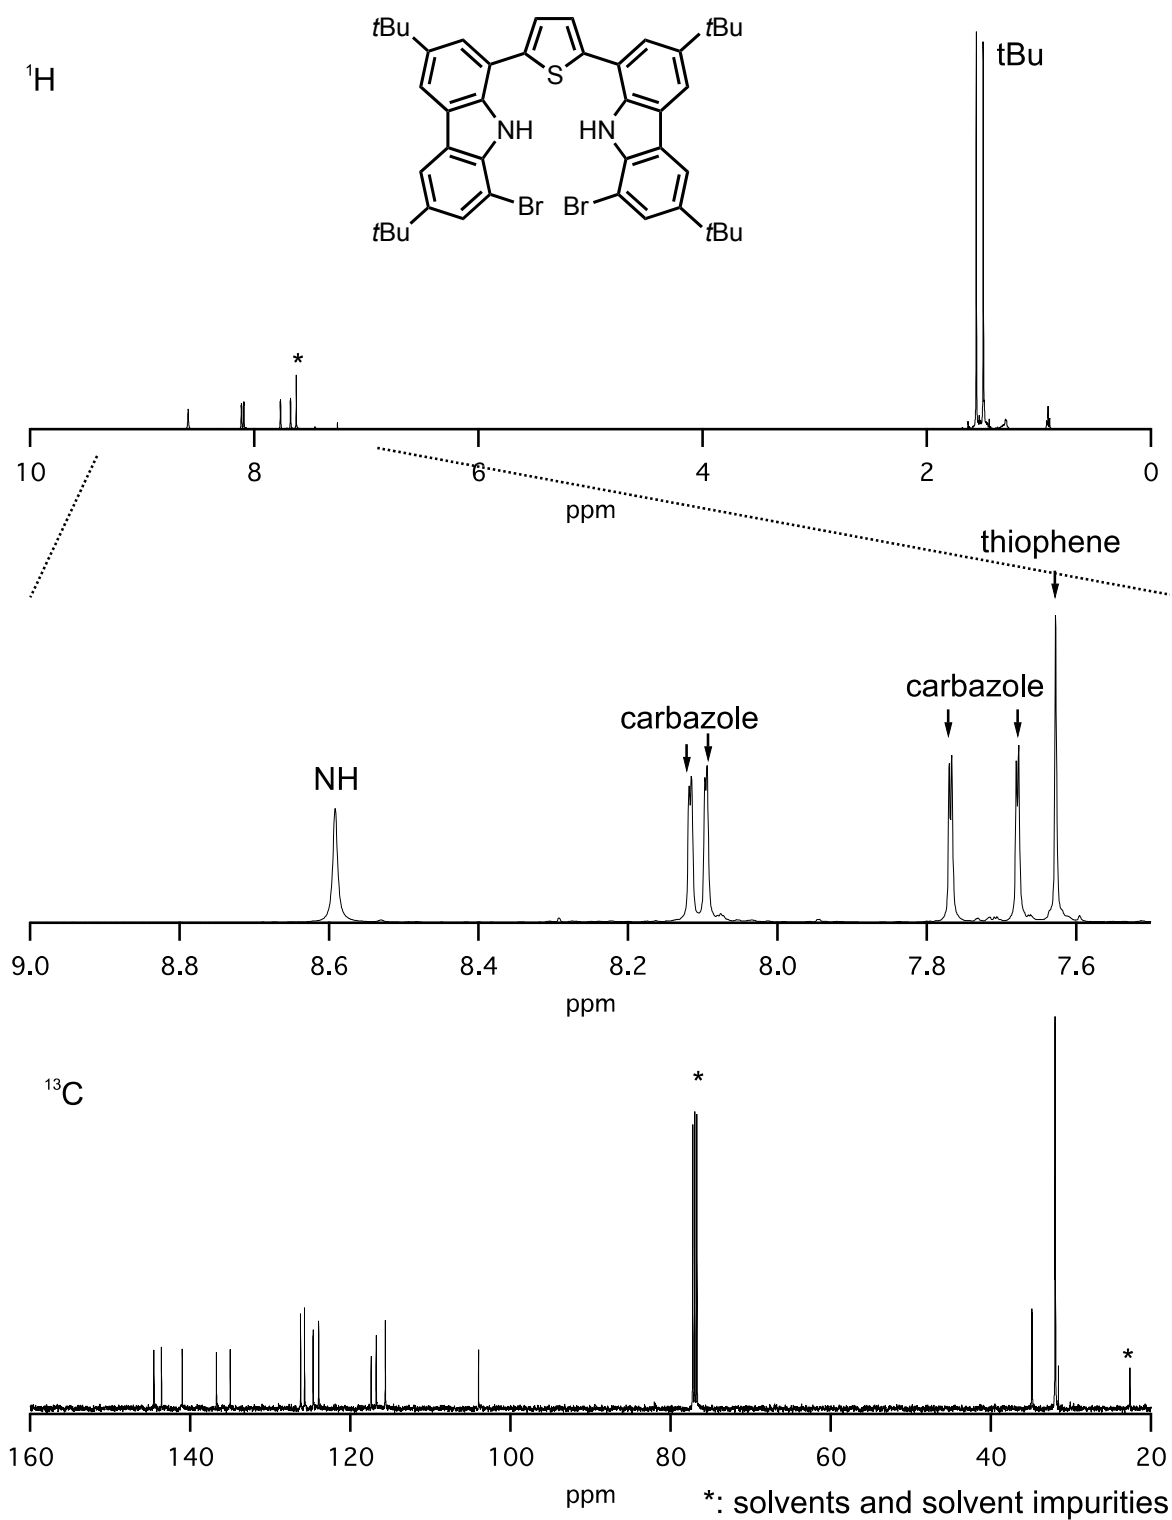

Fig. S2  $^1\text{H}$  and  $^{13}\text{C}$  NMR spectra of **8** in  $\text{CDCl}_3$

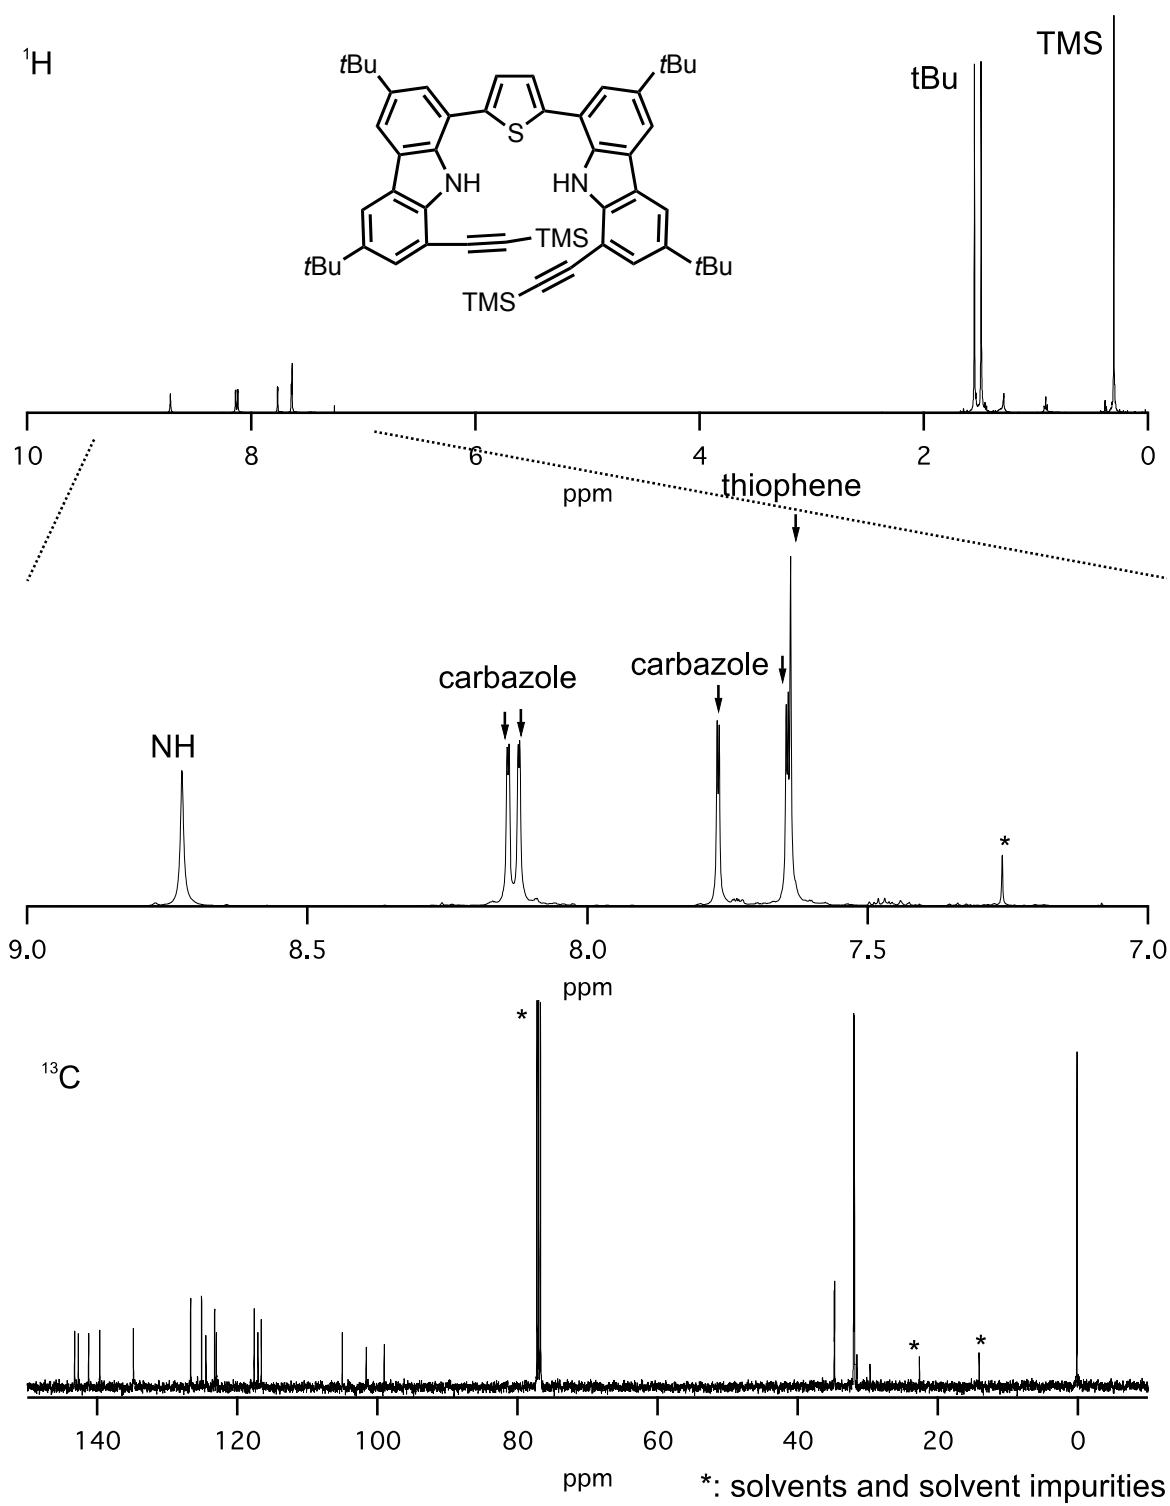

Fig. S3  $^1\text{H}$  and  $^{13}\text{C}$  NMR spectra of **9** in  $\text{CDCl}_3$

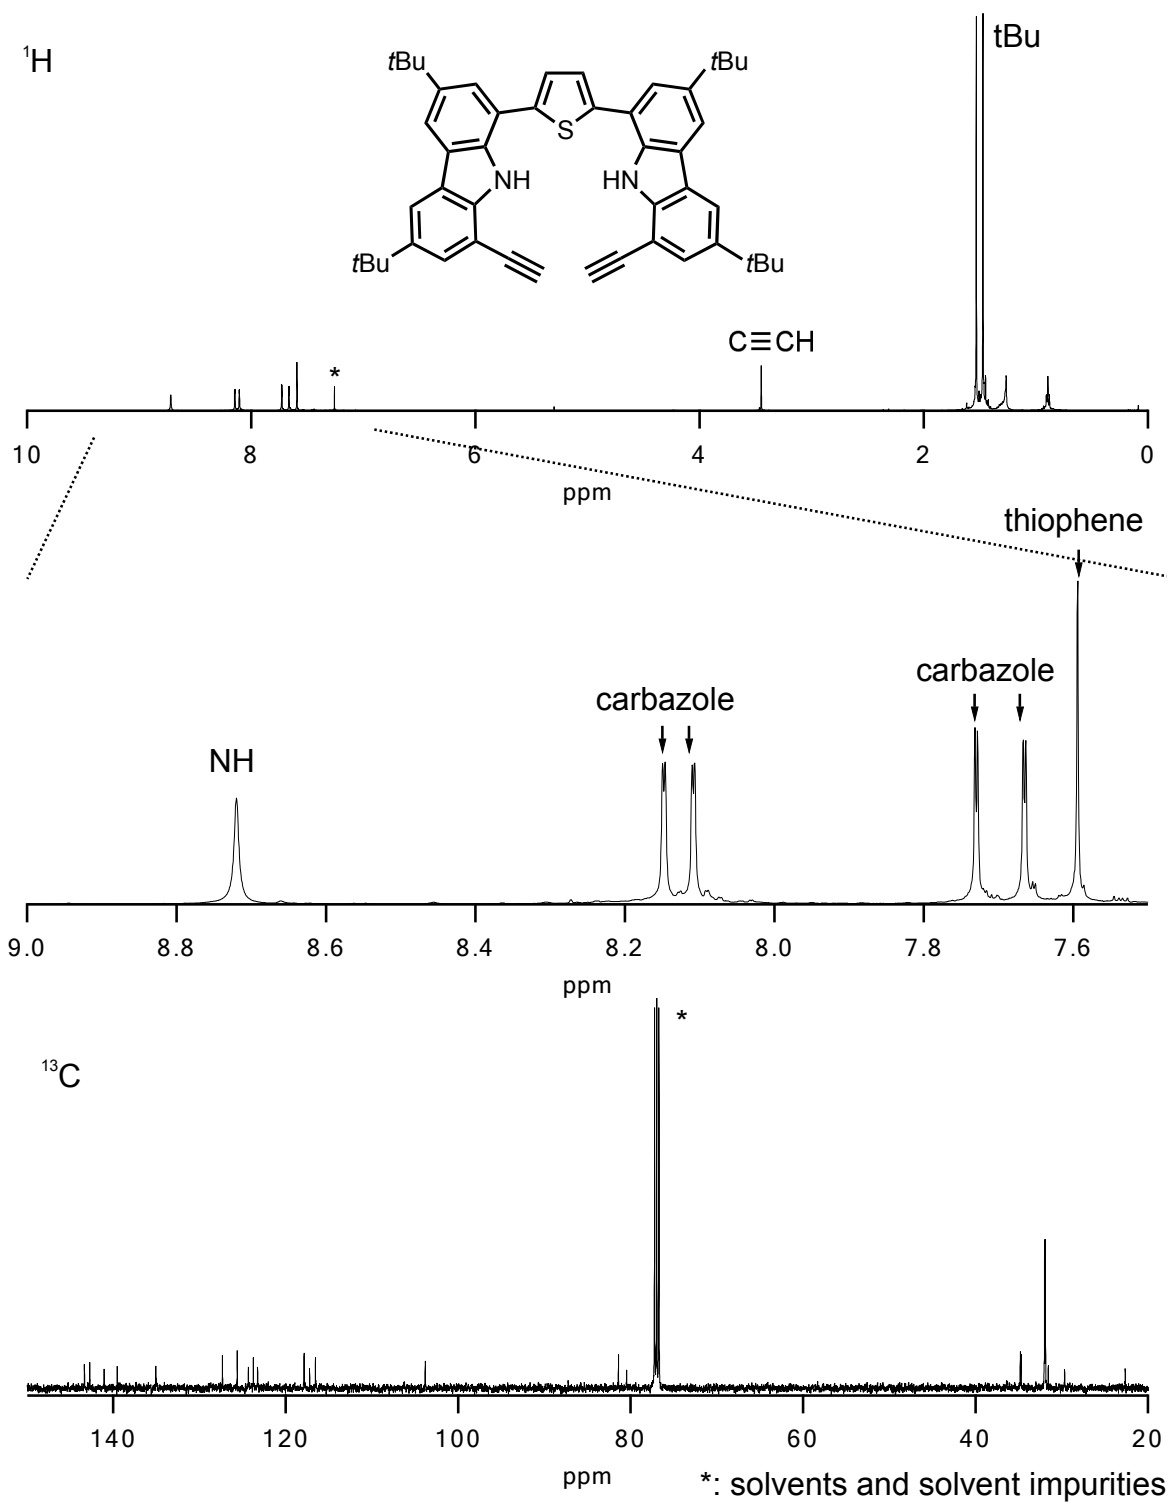

**Fig. S4**  $^1\text{H}$  and  $^{13}\text{C}$  NMR spectra of **10** in  $\text{CDCl}_3$

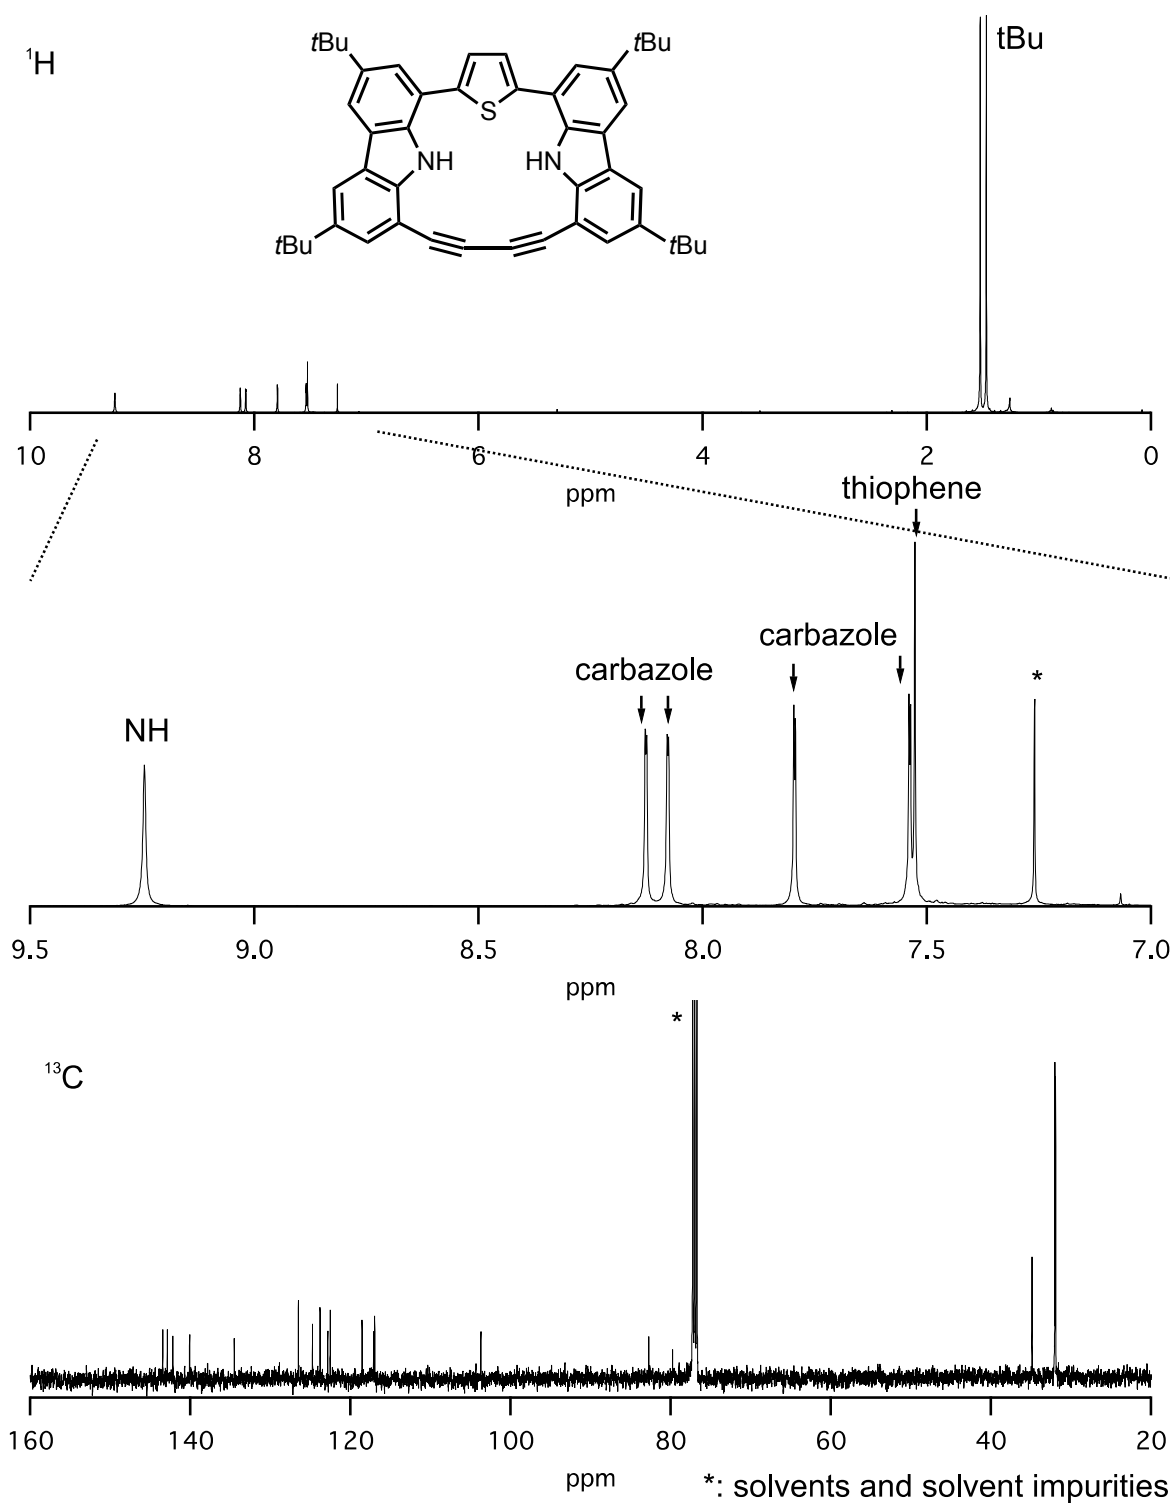

**Fig. S5**  $^1\text{H}$  and  $^{13}\text{C}$  NMR spectra of **11a** in  $\text{CDCl}_3$

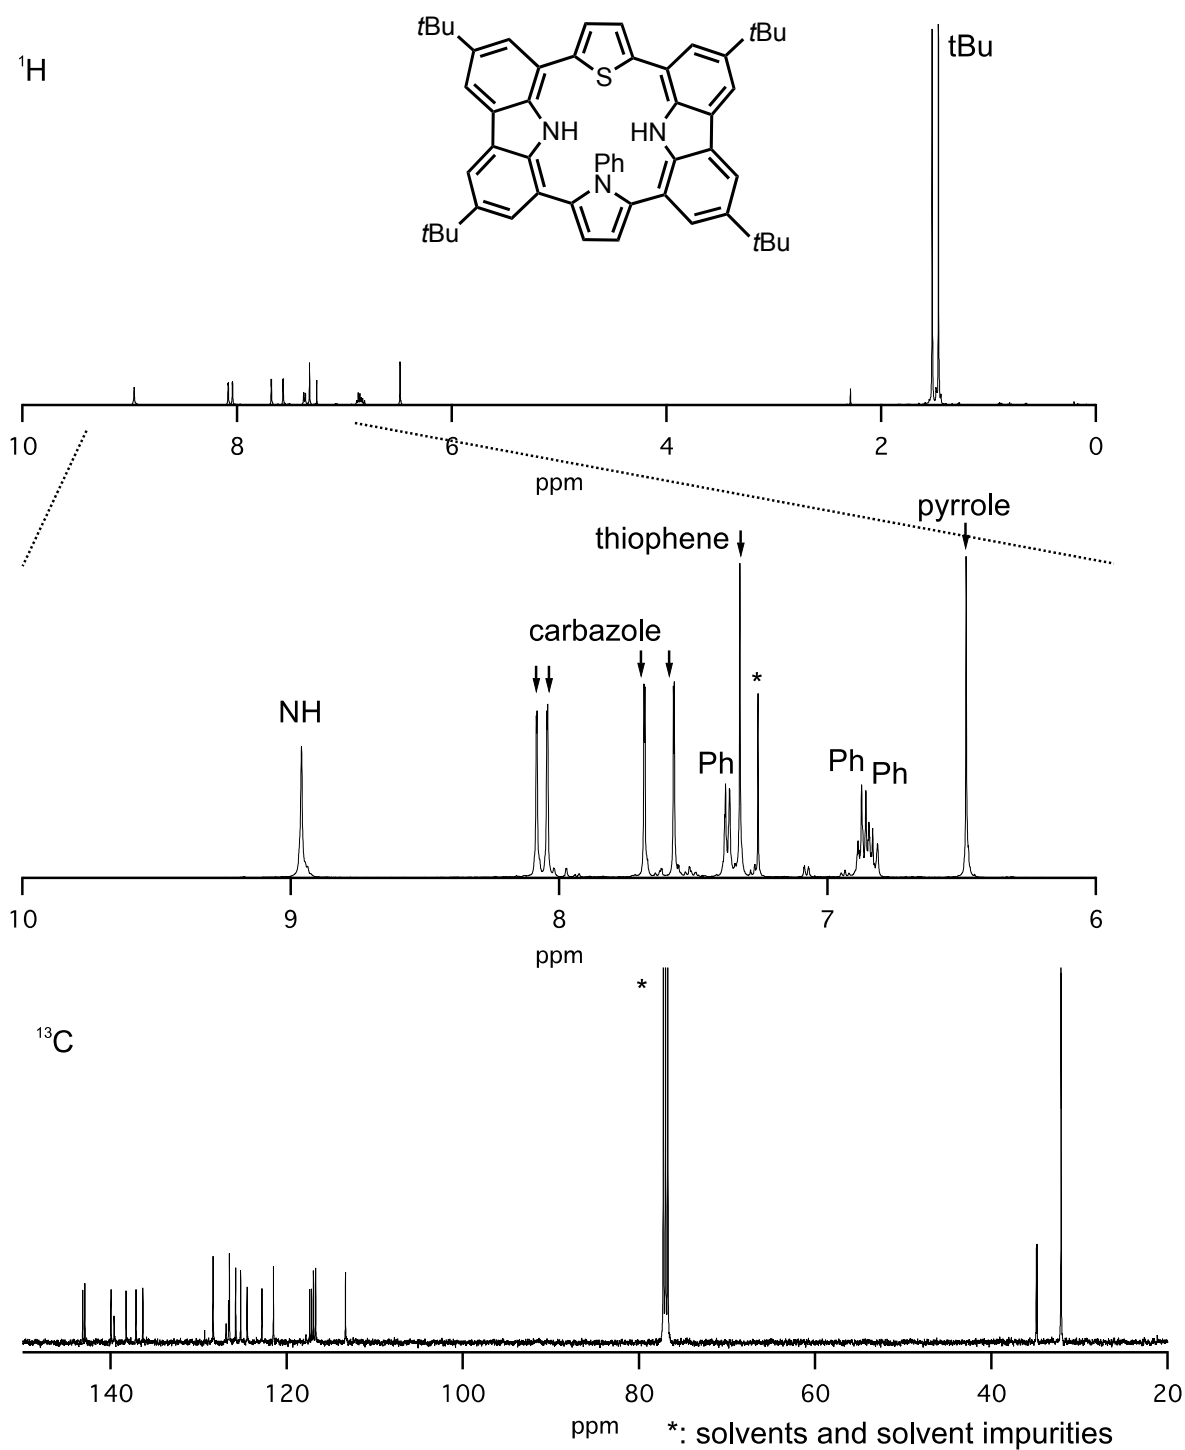

**Fig. S6**  $^1\text{H}$  and  $^{13}\text{C}$  NMR spectra of **11b** in  $\text{CDCl}_3$

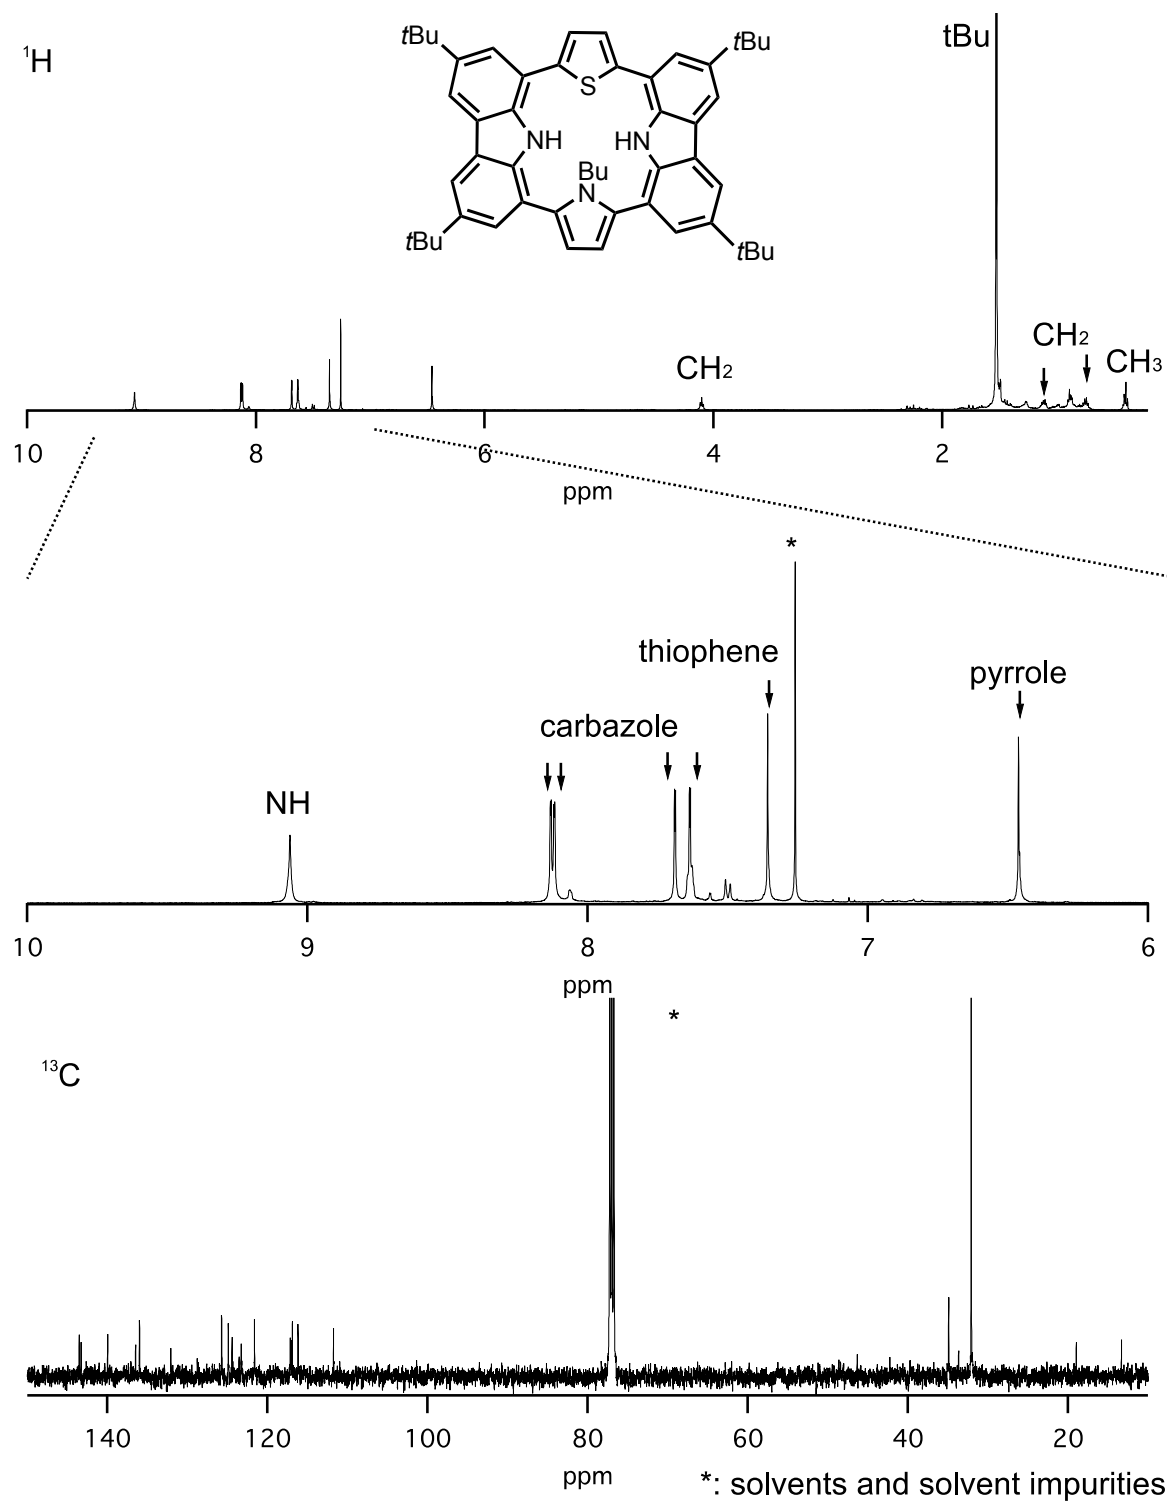

**Fig. S7**  $^1\text{H}$  and  $^{13}\text{C}$  NMR spectra of **11c** in  $\text{CDCl}_3$

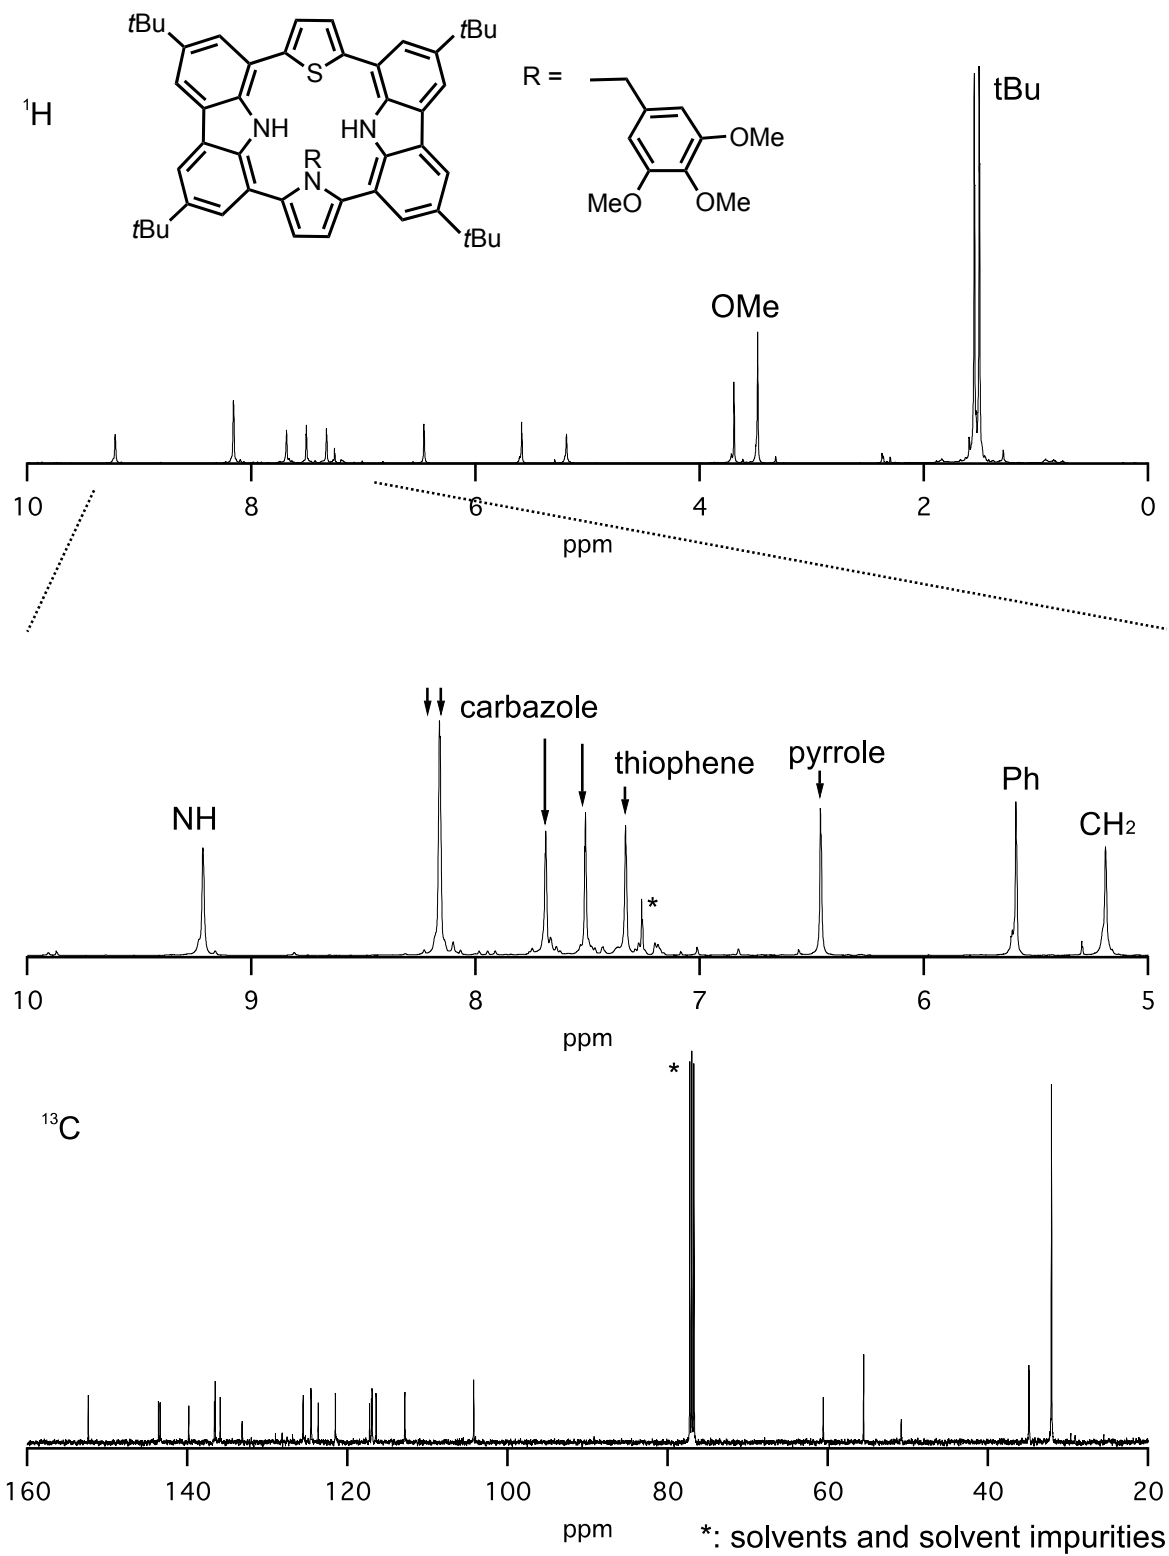



**Fig. S8**  $^1\text{H}$  and  $^{13}\text{C}$  NMR spectra of **12** in  $\text{CDCl}_3$

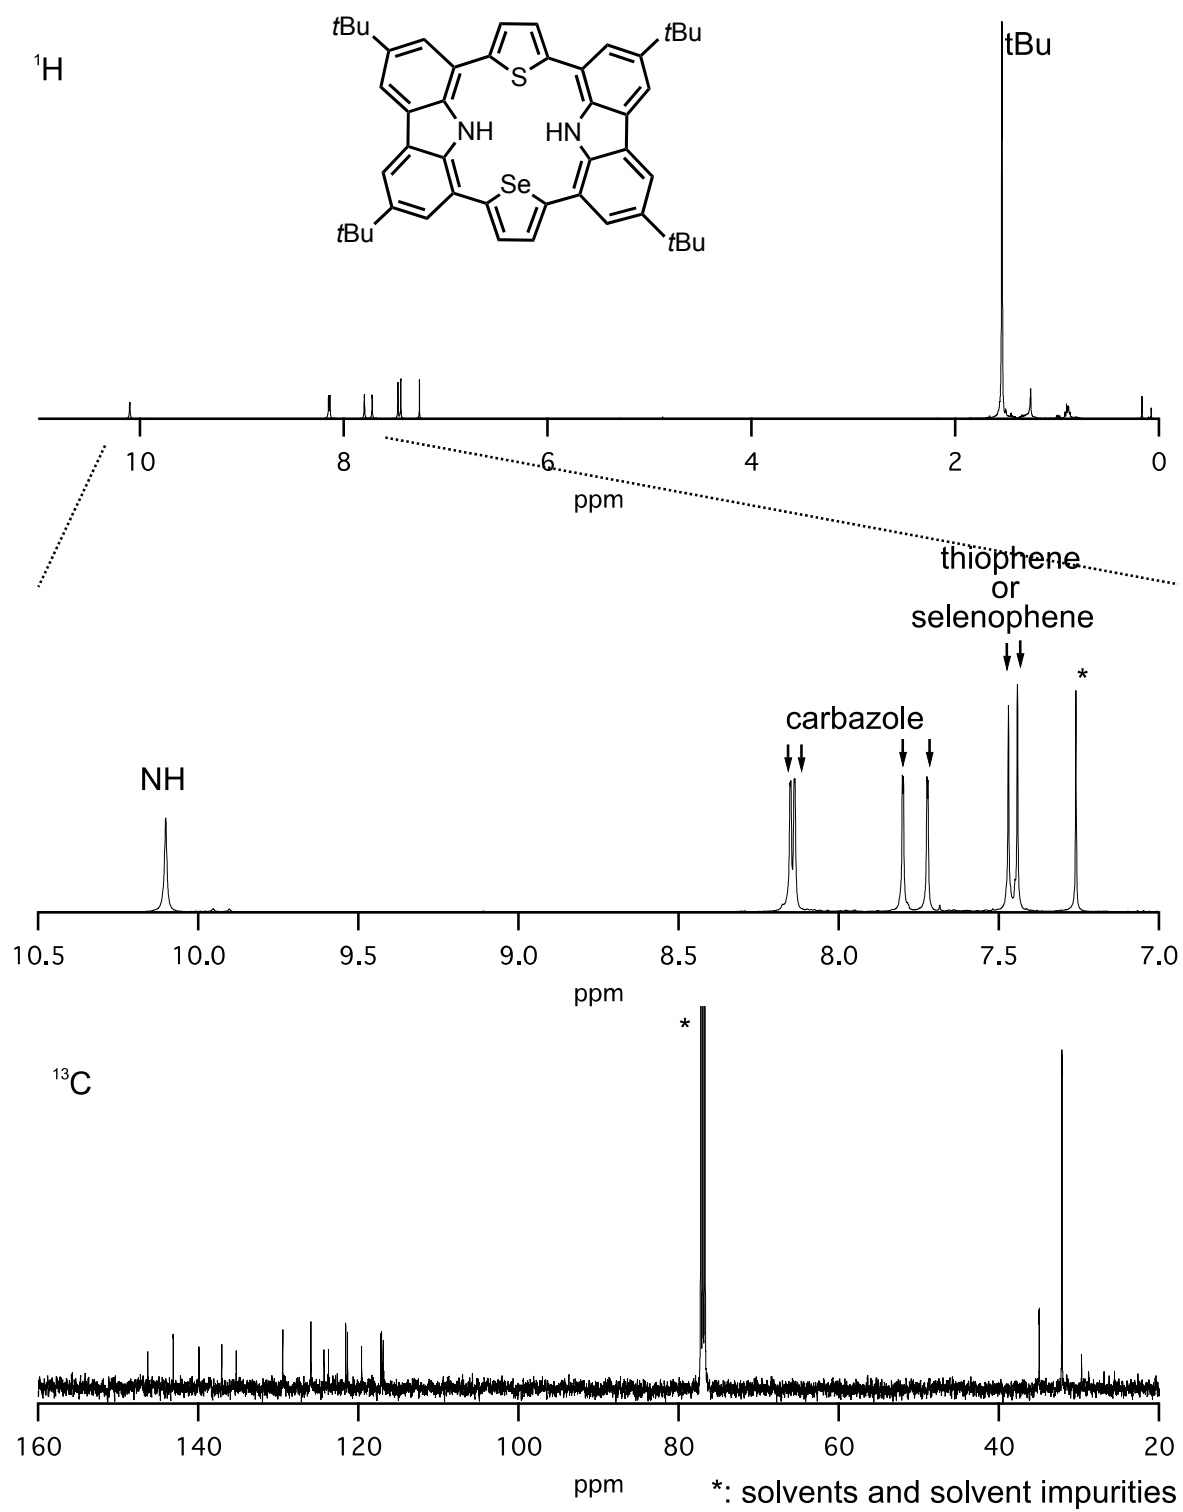

**Fig. S9**  $^1\text{H}$  and  $^{13}\text{C}$  NMR spectra of **13** in  $\text{CDCl}_3$

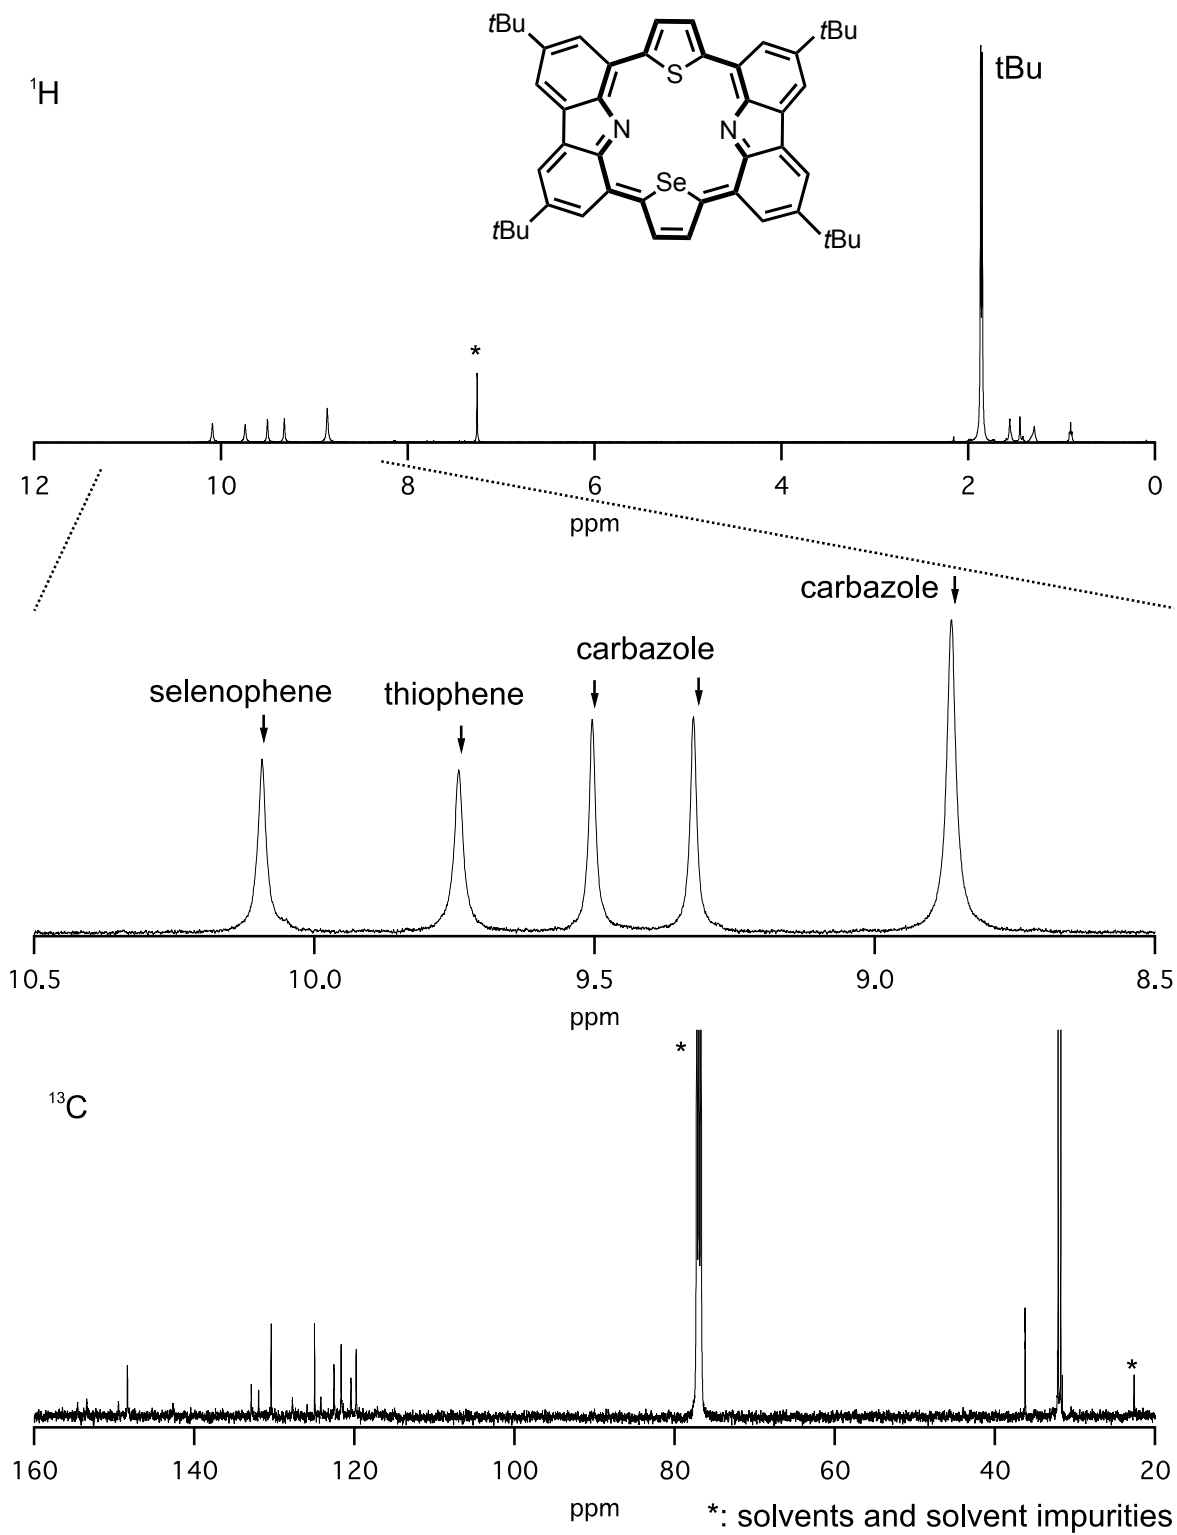

**Fig. S10** Cyclic voltammogram and differential pulse voltammogram of **13** (solvent: CH<sub>2</sub>Cl<sub>2</sub>, supporting electrolyte: Bu<sub>4</sub>NPF<sub>6</sub> (0.10 M), counter electrode: Pt, reference electrode: Ag/Ag<sup>+</sup>, scan rate: 0.05 V/s).

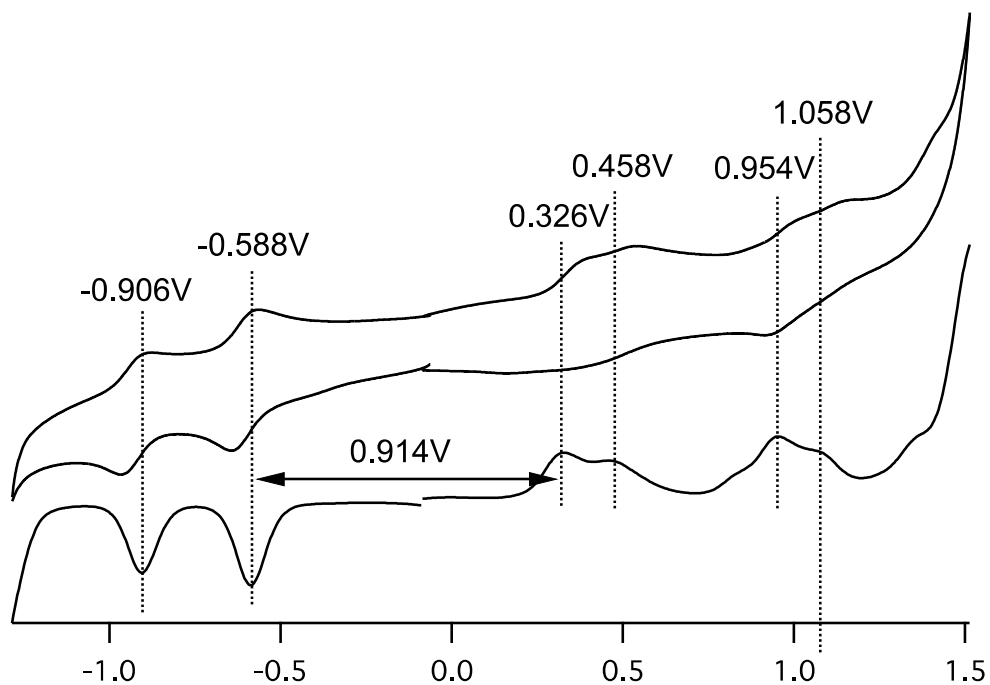

**Fig. S11** NICS(0) values at selected points of (a) **12** and (b) **13** calculated at B3LYP/6-31G(d)/LANL2DZ level using Gaussian 09 package.<sup>[S1-3]</sup>

(a)

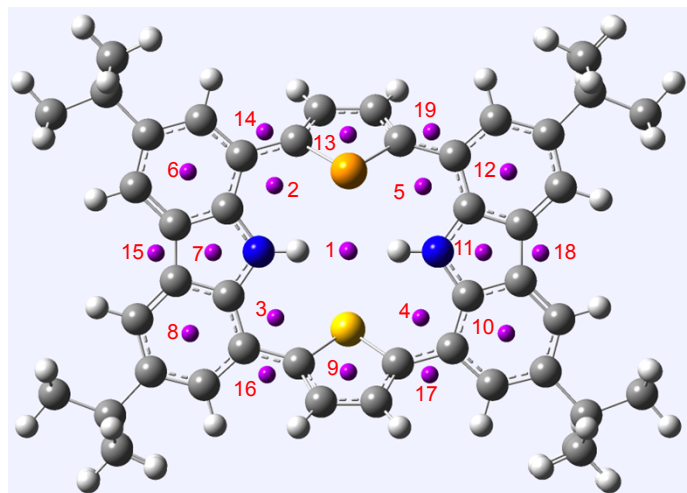

|    |        |
|----|--------|
| 1  | +0.85  |
| 2  | +0.04  |
| 3  | -0.05  |
| 4  | -0.05  |
| 5  | +0.04  |
| 6  | -10.08 |
| 7  | -9.89  |
| 8  | -10.08 |
| 9  | -9.91  |
| 10 | -10.08 |
| 11 | -9.89  |
| 12 | -10.08 |
| 13 | -0.87  |
| 14 | -10.64 |
| 15 | -14.40 |
| 16 | -8.98  |
| 17 | -8.98  |
| 18 | -14.40 |
| 19 | -10.64 |

(b)

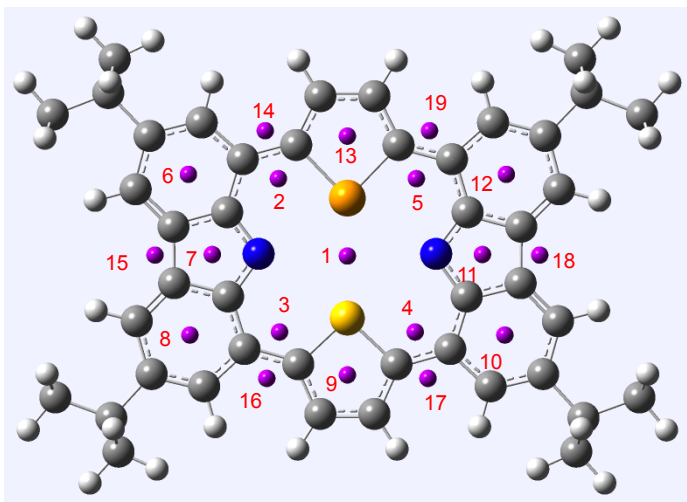

|    |        |
|----|--------|
| 1  | -12.24 |
| 2  | -17.72 |
| 3  | -19.61 |
| 4  | -19.61 |
| 5  | -17.72 |
| 6  | -6.69  |
| 7  | +10.49 |
| 8  | -7.79  |
| 9  | -16.02 |
| 10 | -7.79  |
| 11 | +10.49 |
| 12 | -6.69  |
| 13 | -14.72 |
| 14 | -6.34  |
| 15 | -12.88 |
| 16 | -5.09  |
| 17 | -5.09  |
| 18 | -12.88 |
| 19 | -6.34  |

## X-ray Crystal Structures

Single crystals of **10** and **11a** were obtained by slow diffusion of MeOH vapor into a toluene solution of **10**, and MeOH vapor into a CH<sub>2</sub>Cl<sub>2</sub> solution of **11a**, respectively. X-ray data of **10** at 90 K were taken on a Bruker D8 Venture system with Mo-*K* $\alpha$  radiation ( $\lambda = 0.71073 \text{ \AA}$ ), and structures were processed and refined by APEX2 and Yadokari. X-ray data of **11a** at 93 K were taken on Rigaku-Raxis-RAPID imaging plate system with Cu-*K* $\alpha$  radiation ( $\lambda = 1.54187 \text{ \AA}$ ), and structures were processed and refined by CrystalStructure and Yadokari. All non-hydrogen atoms were refined anisotropically and the hydrogen atoms were calculated in ideal positions.

The contribution to the scattering arising from the presence of disordered solvents in the crystals was removed by use of the utility SQUEEZE in the PLATON software package for **10**.

(a) A. L. Spek, *PLATON, A Multipurpose Crystallographic Tool*; Utrecht, The Netherlands, 2005;

(b) P. van der Sluis, A. L. Spek, *Acta Crystallogr. Sect. A*, 1990, **46**, 194.

**Fig. S12** X-ray crystal structure of **10**. Top view and side view. Hydrogen atoms except for NH and protons are omitted for clarity. The selected bond distances(Å) and angles(°) are shown. The thermal ellipsoids were at 50% probability level.

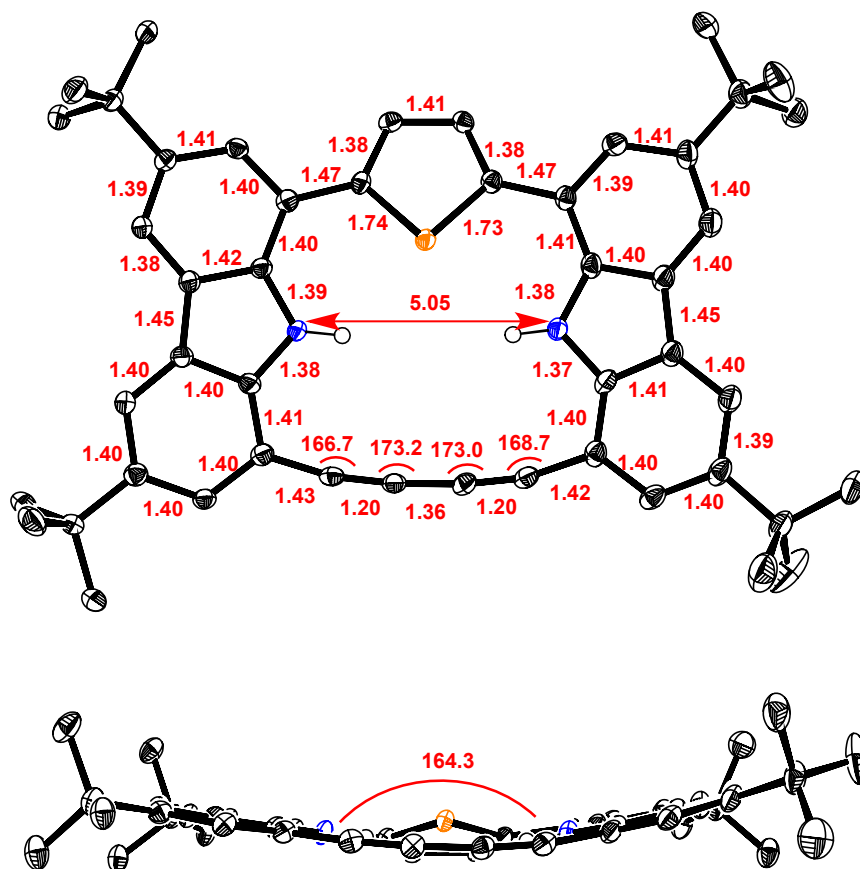

Crystallographic data for **10**: formula:  $2(\text{C}_{46}\text{H}_{46}\text{N}_4\text{S}_2)\text{CHCl}_3$ ,  $M_w = 1489.26$ , triclinic, space group  $P-1$ ,  $a = 15.7704(9)$ ,  $b = 17.0399(9)$ ,  $c = 17.7847(9)$  Å,  $\alpha = 82.2120(10)$ ,  $\beta = 72.642(2)$ ,  $\gamma = 85.179(2)^\circ$ ,  $V = 4514.7(4)$  Å<sup>3</sup>,  $Z = 2$ ,  $\rho_{\text{calcd}} = 1.096$  gcm<sup>-3</sup>,  $T = -183$  °C, 15761 measured reflections, 35820 unique reflections ( $R_{\text{int}} = 0.0315$ ),  $R_1 = 0.0642$  ( $I > 2\sigma(I)$ ),  $wR_2 = 0.1751$  (all data), GOF = 1.106.

**Fig. S13** Preliminary X-ray crystal structure of **11a**. Top view, and side view. Hydrogen atoms except for NH protons are omitted for clarity.

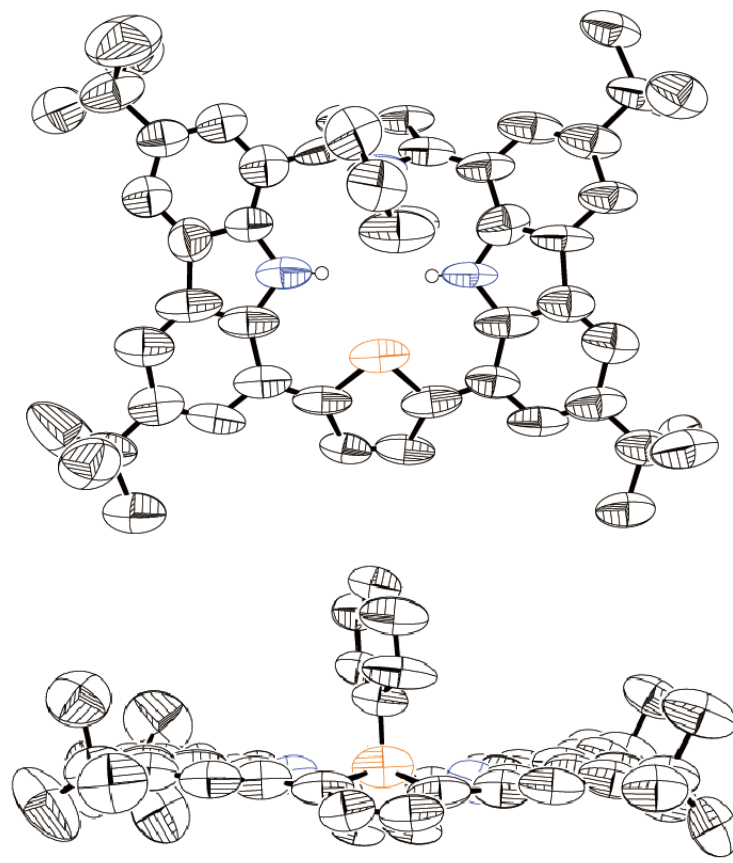

Crystallographic data for **11a**: formula:  $C_{54}H_{55}N_3S_2 \cdot C_{3.26}H_{5.54}Cl_{6.51}$ ,  $M_w = 1053.65$ , triclinic, space group  $P-1$ ,  $a = 11.6816(4)$ ,  $b = 14.7251(5)$ ,  $c = 17.4612(9)$  Å,  $\alpha = 66.3359(19)$ ,  $\beta = 87.8654(18)$ ,  $\gamma = 80.034(2)^\circ$ ,  $V = 2707.75(19)$  Å<sup>3</sup>,  $Z = 2$ ,  $\rho_{\text{calcd}} = 1.292$  gcm<sup>-3</sup>,  $T = -180$  °C, 2481 measured reflections, 8383 unique reflections ( $R_{\text{int}} = 0.1080$ ),  $R_1 = 0.1504$  ( $I > 2\sigma(I)$ ),  $wR_2 = 0.3750$  (all data), GOF = 1.024.

## References

- [S1] *Gaussian 09, Revision C.01*. M. J. Frisch, G. W. Trucks, H. B. Schlegel, G. E. Scuseria, M. A. Robb, J. R. Cheeseman, G. Scalmani, V. Barone, B. Mennucci, G. A. Petersson, H. Nakatsuji, M. Caricato, X. Li, H. P. Hratchian, A. F. Izmaylov, J. Bloino, G. Zheng, J. L. Sonnenberg, M. Hada, M. Ehara, K. Toyota, R. Fukuda, J. Hasegawa, M. Ishida, T. Nakajima, Y. Honda, O. Kitao, H. Nakai, T. Vreven, J. A. Montgomery, Jr., J. E. Peralta, F. Ogliaro, M. Bearpark, J. J. Heyd, E. Brothers, K. N. Kudin, V. N. Staroverov, R. Kobayashi, J. Normand, K. Raghavachari, A. Rendell, J. C. Burant, S. S. Iyengar, J. Tomasi, M. Cossi, N. Rega, J. M. Millam, M. Klene, J. E. Knox, J. B. Cross, V. Bakken, C. Adamo, J. Jaramillo, R. Gomperts, R. E. Stratmann, O. Yazyev, A. J. Austin, R. Cammi, C. Pomelli, J. W. Ochterski, R. L. Martin, K. Morokuma, V. G. Zakrzewski, G. A. Voth, P. Salvador, J. J. Dannenberg, S. Dapprich, A. D. Daniels, Ö. Farkas, J. B. Foresman, J. V. Ortiz, J. Cioslowski, and D. J. Fox, Gaussian, Inc., Wallingford CT, 2009.
- [S2] A. D. Becke, *J. Chem. Phys.*, 1993, **98**, 1372.
- [S3] C. Lee, W. Yang, R. G. Parr, *Phys. Rev. B*, 1988, **37**, 785.
